# Supplementary material for: Automated approach for quality assessment of RDF resources
Source: BMC Med Inform Decis Mak. 2023 May 10;23(Suppl 1):90. doi: 10.1186/s12911-023-02182-8 (PMC10170671; doi:10.1186/s12911-023-02182-8)
Supplement: Supplementary file 1 — Additional file 1. Metric Pool. Additional file 1 lists all 155 metricswith their attributes including index, quality dimension, metric name, definition, source, whether it is objective, whether it is automatable, whether it is foundational, and comment. [file 12911_2023_2182_MOESM1_ESM.xlsx]

## Sheet: Metric Pool
Index	Dimension	Metric	Intepretation	Source	Zaveri O/S	Objective	Automatable	Foundational	Comment
1	Availability	accessibility of the SPARQL endpoint and the server	checking whether the server responds to a SPARQL query	Zaveri Metric	O	O	N	N			Y: Yes; N: No; N/A: Not applicable; S: Subjective; O: Objective; S&O: Subjective and Objective
2	Availability	accessibility of the RDF dumps	checking whether a RDF dump is provided and can be downloaded	Zaveri Metric	O	O	Y	Y	Relate to "resolvability"
3	Availability	dereferencability issues	when a URI returns an error (4xx client error/ 5xx server error) response code or detection of broken links	Zaveri Metric	O	O	Y	Y	Relate to "resolvability"
4	Availability	no structured data available	detection of dead links or detection of a URI without any supporting RDF metadata or no redirection using the status code 303 See Other or no code 200 OK	Zaveri Metric	O	O	Y	Y	Relate to "parsability"
5	Availability	no dereferenced back-links	detection of all local in-links or back-links: locally available triples in which the resource URI appears as an object, in the dereferenced document returned for the given resource	Zaveri Metric	O	O	N	N
6	Availability	no dereferenced forward-links	detection of all forward links: locally known triples where the Local URI is mentioned in the subject	Zaveri Metric	O	O	N	N			* indicates whether this metric is objective or subjective is different from Zaveri's decision
7	Availability	misreported content types	detection of whether the content is suitable for consumption, and whether the content should be accessed	Zaveri Metric	S	S	N	Y
8	Licensing	machine-readable indication of a license	detection of the indication of a license in the VoID description or in the dataset itself	Zaveri Metric	O	O	Y	N
9	Licensing	human-readable indication of a license	detection of a license in the documentation of the dataset or its source	Zaveri Metric	O	O	Y	N
10	Licensing	permissions to use the dataset	detection of license indicating whether reproduction, distribution, modification or redistribution is permitted	Zaveri Metric	O	O	N	N
11	Licensing	indication of attribution, Copyleft or ShareAlike	detection of whether the work is attributed in the same way as specified by the author or licensor	Zaveri Metric	O	O	N	N			count: 155
12	Interlinking	interlinking degree, clustering coefficient, centrality and sameAs chains, description richness through sameAs	by using network measures	Zaveri Metric	O	O	N	N
13	Interlinking	existence of links to external data providers	detection of the existence and usage of external URIs and owl:sameAs links	Zaveri Metric	S	O*	N	N
14	Security	access to data is secure	use of login credentials or use of SSL or SSH	Zaveri Metric	O	O	N	N
15	Security	data is of proprietary nature	data owner allows access only to certain users	Zaveri Metric	O	O	N	N
16	Performance	no usage of slash-URIs	checking for usage of slash-URIs where large amounts of data is provided	Zaveri Metric	O	O	Y	N
17	Performance	low latency	delay between submission of a request by the user and reception of the response from the system	Zaveri Metric	O	O	Y	N
18	Performance	high throughput	no. of answered HTTP-requests per second	Zaveri Metric	O	O	Y	N
19	Performance	scalability of a data source	detection of whether the time to answer an amount of ten requests divided by ten is not longer than the time it takes to answer one request	Zaveri Metric	O	O	Y	N
20	Accuracy	detection of outliers	by using distance-based, deviations-based and distribution-based method	Zaveri Metric	O	O	N	Y
21	Accuracy	inaccurate values	by using functional dependencies rules between the values of two or more different predicates	Zaveri Metric	O	O	N	N
22	Accuracy	inaccurate facts	a single fact is checked individually in different datasets	Zaveri Metric	O	O	N	N
23	Accuracy	malformed datatype literals	detection of ill-typed literals which do not abide by the lexical syntax for their respective datatype	Zaveri Metric	O	O	N	Y
24	Accuracy	literals incompatible with datatype range	detection of a datatype clash that can then occur if the property is given a value (i) that is malformed, or (ii) that is a member of an incompatible datatype	Zaveri Metric	O	O	N	Y
25	Accuracy	erroneous annotation/representation erroneous	One minus the proportion of erroneous instances to total instances	Zaveri Metric	O	S*	N	Y
26	Accuracy	inaccurate annotation, labelling, classification		Zaveri Metric	O	S*	N	Y
27	Consistency	entities as members of disjoint classes	A formula to calculate proportions	Zaveri Metric	O	O	N	Y
28	Consistency	usage of homogeneous datatypes	A formula to calculate proportions	Zaveri Metric	O	O	N	N
29	Consistency	invalid usage of undefined classes and properties	detection of classes and properties used without any formal definition	Zaveri Metric	O	O	Y	Y	Relate to "undefined terms"
30	Consistency	misplaced classes or properties	using entailment rules that indicate the position of a term in a triple	Zaveri Metric	O	O	Y	Y	Relate to "misplaced classes or properties"
31	Consistency	misuse of owl:datatypeProperty or owl:objectProperty	using weighting scheme that identifies that most usage is contrary to the vocabulary constraint	Zaveri Metric	O	O	Y	Y	Relate to "misused properties"
32	Consistency	use of members of owl:DeprecatedClass or owl:-DeprecatedProperty	based on a manual mapping between deprecated terms and compatible term	Zaveri Metric	O	O	Y	Y	Relate to "deprecated terms"
33	Consistency	provide a blacklist for void values	list all bogus owl:Inverse-FunctionalProperty values	Zaveri Metric	O	O	N	Y
34	Consistency	ontology hijacking	detection of the redefinition by third parties of external classes/ properties such that reasoning over data using those exter- nal terms is affected	Zaveri Metric	O	O	N	Y
35	Consistency	misuse of predicates	profiling statistics support the detection of such discordant values or misused predicates and facilitate to find valid for- mats for specific predicate	Zaveri Metric	O	O	N	Y
36	Consistency	ambiguous annotation	One minus the proportion of ambiguous instances to all instances contained in the metadata set	Zaveri Metric	O	S*	N	Y
37	Conciseness	intensional conciseness	The number of unique attributes in a dataset divided by the total number of attributes in target schema	Zaveri Metric	O	S*	N	N
38	Conciseness	extensional conciseness	The number of unique objects in a dataset divided by the total number of object representations in the dataset	Zaveri Metric	O	O	Y	N
39	Conciseness	duplicate instance	One minus the proportion of the duplcate instances to all relevant instances	Zaveri Metric	O	O	Y	N
40	Reputation	reputation of the dataset	by assigning explicit ratings to the dataset (manual) and analyzing external links or page rank (semi-automated)	Zaveri Metric	S	S	N	N
41	Believability	meta-information about the identity of information provider	checking whether the provider/contributor is contained in a list of trusted providers	Zaveri Metric	O	O	N	N
42	Believability	indication of metadata about a dataset (provenance information)	presence of the title, content and URI of the dataset	Zaveri Metric	O	O	Y	N
43	Believability	computing the trustworthiness of RDF statements	computing a trust value based on the provenance information which can be either unknown or a value in the interval [-1,1] where 1: absolute belief, -1: absolute disbelief and 0:lack of belief/disbelief	Zaveri Metric	O	O	N	N
44	Believability	computing the trust of an entity	construction of decision networks informed by provenance graphs	Zaveri Metric	O	O	N	N
45	Believability	accuracy of computing the trust between two entities	by using a combination of (1) a propagation algorithm which utilizes statistical techniques for computing trust values between 2 entities through a path and (2) an aggre- gation algorithm based on a weighting mechanism for cal- culating the aggregate value of trust over all paths	Zaveri Metric	O	O	N	N
46	Believability	acquiring content trust from users	based on associations that transfer trust from entities to resources	Zaveri Metric	O	O	N	N
47	Believability	assigning trust values to data/ sources/rules	use of trust ontologies that assign content-based or metadata-based trust values that can be transferred from known to unknown data	Zaveri Metric	O	O	N	N
48	Believability	determining trust value for data	using annotations for data such as (i) blacklisting, (ii) authoritativeness and (iii) ranking and using reasoning to in- corporate trust values to the data	Zaveri Metric	O	O	N	N
49	Believability	computing personalized trust recommen- dations	using provenance of existing trust annotations in social networks	Zaveri Metric	S	S	N	N
50	Believability	detection of reliability and credibility of a data source	use of trust annotations made by several individuals to derive an assessment of the sources’ reliability and credibil- ity	Zaveri Metric	S	S	N	N
51	Believability	computing the trustworthiness of RDF statements	computing a trust value based on user-based ratings or opinion-based method	Zaveri Metric	S	S	N	N
52	Believability	detect the reliability and credibility of the dataset publisher	indication of the level of trust for the publisher on a scale of1−9	Zaveri Metric	S	S	N	N
53	Verifiability	authenticity of the dataset	verifying authenticity of the dataset based on a provenance vocabulary such as the author and his contributors, the pub- lisher of the data and its sources if any	Zaveri Metric	O	O	Y	N
54	Verifiability	usage of digital signatures	by signing a document containing an RDF serialization or signing an RDF graph	Zaveri Metric	O	O	N	N
55	Verifiability	correctness of the dataset	verifying correctness of the dataset with the help of unbiased trusted third party	Zaveri Metric	S	S	N	N
56	Objectivity	objectivity of the information	checking for bias or opinion expressed when a data provider interprets or analyzes facts	Zaveri Metric	S	S	N	N
57	Objectivity	objectivity of the source	checking whether independent sources confirm a fact	Zaveri Metric	S	S	N	N
58	Objectivity	no biased data provided by the publisher	checking whether the dataset is neutral or the publisher has a personal influence on the data provided	Zaveri Metric	S	S	N	N
59	Currency	currency of documents/statements		Zaveri Metric	O	O	N	N
60	Currency	time since modification	observation time - last modified time	Zaveri Metric	O	O	N	N
61	Currency	exclusion of outdated data		Zaveri Metric	O	O	N	Y
62	Volatility	frequency of change	refer to the change frequency attribute in a Semantic sitemap for value of the frequency or updates of a data source	Zaveri Metric	O	O	N	N
63	Volatility	time validity interval	expiry time − input time of the semantic web source	Zaveri Metric	O	O	N	N
64	Timeliness	timeliness between the semantic source web and original source	a positive difference between last modified time of the original source and last modified time of the semantic web source implies data source to be outdated	Zaveri Metric	O	O	N	N
65	Timeliness	timeliness of the resource	a positive difference between current and expiry time of the resource implies data source to be outdated	Zaveri Metric	O	O	N	N
66	Timeliness	timeliness between the ideal freshness and the data source freshness		Zaveri Metric	O	O	N	N
67	Completeness	schema completeness	no. of classes and properties represented / total no. of classes and properties	Zaveri Metric	O	O	Y	N
68	Completeness	property completeness	no. of values represented for a specific property / total no. of values for a specific propert	Zaveri Metric	O	O	N	N
69	Completeness	population completeness	no. of real-world objects are represented / total no. of real-world objects	Zaveri Metric	O	O	N	N
70	Completeness	interlinking completeness	no. of instances in the dataset that are interlinked / total no. of instances in a dataset	Zaveri Metric	O	O	N	N
71	Amount-of-data	appropriate volume of data for a particular task	ratio of no. of semantically valid association rules to the no. of non-trivial rules	Zaveri Metric	O	O	N	N
72	Amount-of-data	appropriate amount of data	use of the apriori algorithm to detect poor predicates based on the occurrence dependencies among predicates	Zaveri Metric	O	O	N	N
73	Amount-of-data	amount of triples	no. of triples present in a dataset	Zaveri Metric	O	O	Y	N
74	Amount-of-data	coverage	scope (no. of entities) and level of detail (no. of properties)	Zaveri Metric	O	O	Y	N
75	Relevancy	usage of meta-information attributes	counting the occurrence of relevant terms within these at tributes or using vector space model and assigning higher weight to terms that appear within the meta-information attributes	Zaveri Metric	S	S	N	N
76	Relevancy	retrieval of relevant resources	sorting documents according to their relevancy for a given query	Zaveri Metric	S	S	N	N
77	Representational- conciseness	keeping URIs short	detection of long URIs or those that contain query parameters	Zaveri Metric	O	O	N	N
78	Representational- conciseness	no use of prolix RDF features	detect use of RDF primitives i.e. RDF reification, RDF containers and RDF collections	Zaveri Metric	O	O	Y	N
79	Representational- consistency	re-use existing terms	detect whether existing terms from other vocabularies have been reused	Zaveri Metric	O	O	Y	N
80	Representational- consistency	re-use existing vocabularies	usage of established vocabularies	Zaveri Metric	S	O*	Y	N
81	Understandability	human-readable labelling of classes, properties and entities	percentage of entities having an rdfs:label or rdfs:comment	Zaveri Metric	O	O	Y	N
82	Understandability	dereferenced representations: providing human-readable metadata	detecting the use of rdfs:label to attach labels or names to resources	Zaveri Metric	O	O	Y	N
83	Understandability	indication of one or more exemplary URIs	detecting whether the pattern of the URIs is provided	Zaveri Metric	O	O	N	N
84	Understandability	indication of a regular expression that matches the URIs of a dataset	detecting whether a regular expression that matches the URIs is present	Zaveri Metric	O	O	N	N
85	Understandability	indication of an exemplary SPARQL query	detecting whether examples of SPARQL queries are provided	Zaveri Metric	O	O	N	N
86	Understandability	indication of the vocabularies used in the dataset	checking whether a list of vocabularies used in the dataset is provided	Zaveri Metric	O	O	Y	N
87	Understandability	provision of message boards and mailing lists	checking the effectiveness and the efficiency of the usage of the mailing list and/or the message boards	Zaveri Metric	O	O	N	N
88	Interpretability	use of self-descriptive formats	identifying objects and terms used to define these objects with globally unique identifiers	Zaveri Metric	S	S	N	N
89	Interpretability	interpretability of terms	use of various schema languages to provide definitions for terms	Zaveri Metric	S	S	N	N
90	Interpretability	interpretability of data	detect the use of appropriate language, symbols, units and clear definitions	Zaveri Metric	O	S*	N	Y
91	Interpretability	misinterpretation of missing values	detecting use of blank nodes	Zaveri Metric	O	O	Y	N
92	Interpretability	atypical use of collections, containers and reification	detect non-standard usage of collections, containers and reification(since these features are discouraged from use by Linked Data guidelines)	Zaveri Metric	O	O	Y	N
93	Versatility	provision of the data in different serialization formats	checking whether data is available in different serialization formats	Zaveri Metric	O	O	Y	Y	Duplicate - metric 96
94	Versatility	provision of the data in various languages	checking whether data is available in different languages	Zaveri Metric	O	O	Y	N
95	Versatility	accessing of data in different ways	checking whether the data is available as SPARQL endpoint and for download as RDF dump	Zaveri Metric	O	O	N	N
96	Versatility	application of content negotiation	checking whether data can be retrieved in accepted formats and languages by adding a corresponding accept-header to an HTTP request	Zaveri Metric	O	O	Y	Y	Relate to "parsability"
97	Accuracy	Accuracy	The degree to which data has attributes that correctly represent the true value of the intended attribute of a concept or event in a specific context of use.	ISO 25012		S & O	N	N
98	Completeness	Completeness	The degree to which subject data associated with an entity has values for all expected attributes and related entity instances in a specific context of use.	ISO 25012		S & O	N	N
99	Consistency	Consistency	The degree to which data has attributes that are free from contradiction and are coherent with other data in a specific context of use.	ISO 25012		O	Y	Y	Duplicate - metric 29-32
100	Credibility	Credibility	The degree to which data has attributes that are regarded as true and believable by users in a specific context of use.	ISO 25012		S & O	N	N
101	Currentness	Currentness	The degree to which data has attributes that are of the right age in a specific context of use.	ISO 25012		S & O	N	N
102	Accessibility	Accessibility	The degree to which data can be accessed in a specific context of use, particularly by people who need supporting technology or special configuration because of some disability.	ISO 25012		O	Y	Y	Duplicate - metric 2-4
103	Compliance	Compliance	The degree to which data has attributes that adhere to standards, conventions or regulations in force and similar rules relating to data quality in a specific context of use.	ISO 25012		O	Y	N
104	Confidentiality	Confidentiality	The degree to which data has attributes that ensure that it is only accessible and interpretable by authorized users in a specific context of use.	ISO 25012		O	N	N
105	Efficiency	Efficiency	The degree to which data has attributes that can be processed and provide the expected levels of performance by using the appropriate amounts and types of resources in a specific context of use.	ISO 25012		O	Y	N
106	Precision	Precision	The degree to which data has attributes that are exact or that provide discrimination in a specific context of use.	ISO 25012		S & O	N	N
107	Traceability	Traceability	The degree to which data has attributes that provide an audit trail of access to the data and of any changes made to the data in a specific context of use.	ISO 25012		O	N	N
108	Understandability	Understandability	The degree to which data has attributes that enable it to be read and interpreted by users, and are expressed in appropriate languages, symbols and units in a specific context of use.	ISO 25012		S & O	N	Y
109	Availability	Availability	The degree to which data has attributes that enable it to be retrieved by authorized users and/or applications in a specific context of use.	ISO 25012		O	Y	Y	Duplicate - metric 93, 94, 96
110	Portability	Portability	The degree to which data has attributes that enable it to be installed, replaced or moved from one system to another preserving the existing quality in a specific context of use.	ISO 25012		O	Y	N
111	Recoverability	Recoverability	The degree to which data has attributes that enable it to maintain and preserve a specified level of operations and quality, even in the event of failure, in a specific context of use.	ISO 25012		O	N	N
112	Availability	Availability of the SPARQL end-point metric	Checks whether the server (endpoint) is reachable and responds to a SPARQL query	DQM Vocab		O	N	N
113	Availability	Availability of the RDF dumps metric	Upon request of an RDF dump, checks whether it is provided as result	DQM Vocab		O	Y	Y	Duplicate - metric 2
114	Availability	Dereferenceability metric	Determines whether requesting a resource, identified by a URI, results in an error code being returned (e.g. 4xx: client error or 5xx: server error), or in a broken link" ;	DQM Vocab		O	Y	Y	Duplicate - metric 3
115	Availability	Dereferenceability of forward-links metric	Detects all forward links (locally known triples where the local URI is mentioned in the subject)" ;	DQM Vocab		O	N	N
116	Availability	Misreported content types metric	Checks whether the content is suitable for consumption and if such content should be accessed	DQM Vocab		S	N	Y
117	Licensing	Machine-readable indication of a license metric	"Verifies that the resource is annotated with a machine-readable indication of the license (e.g. a VoID description or dcterms:license property)" ;	DQM Vocab		O	Y	N	Duplicate - metric 8
118	Licensing	Human-readable indication of a license metric	"Verifies whether a human-readable text, stating the licensing model attributed to the resource, has been provided as part of the dataset" ;	DQM Vocab		O	Y	N	Duplicate - metric 9
119	Security	Digital Signature Usage	"This metric checks foaf documents have a digital signature with them." ;	DQM Vocab		O	N	N
120	Performance	Low latency metric	"Measures the delay between the submission of a request to the data source and the reception of the respective response (or the first part of it)" ;	DQM Vocab		O	Y	N	Duplicate - metric 16
121	Performance	High throughput metric	"Measures the number of answered HTTP requests responsed by the source of the dataset, per second" ;	DQM Vocab		O	Y	N	Duplicate - metric 17
122	Performance	Scalability of a data source metric	"Determines whether the time required to answer a set of N requests divided by N, is not longer than the time it takes to answer a single request" ;	DQM Vocab		O	Y	N	Duplicate - metric 18
123	Performance	Correct Usage of Cool URIs	"Determines whether URIs in a dataset are represented as Slash URIs if dataset is large, or Hash URIs otherwise" ;	DQM Vocab		O	Y	N	Duplicate - metric 19
124	Interlinking	Dereferenceability of back-links metric	"Detects all local in-links or back-links (locally available triples with the resource URI appearing as object, in the dereferenced document returned for the resource)" ;	DQM Vocab		O	N	N
125	Interlinking	Interlink Detection Metric	"This is a complex metric that detects good quality interlinks by measuring the (i) interlink degree; (ii) clustering coefficient; (iii) centrality; (iv) open sameAs chains; (v) sameAs description richness" ;	DQM Vocab		O	N	N
126	Interlinking	Existence of links to external data providers	"Measures the degree to which the resource is linked to external data providers, that is, refers to the detection of links that connect the resource to external data provided by another data sources" ;	DQM Vocab		O*	N	N
127	Consistency	Entities as members of disjoint classes metric	"The ratio of entities described as members of disjoint classes (here: classes explicitly known as disjoint) to the total number of entities described in the dataset" ;	DQM Vocab		O	N	Y
128	Consistency	Misplaced classes or properties metric	"Find resources that are - defined as a property but also appear on subject or object positions in other triples (except cases like ex:prop rdf:type rdf:Property, ex:prop rds:subPropetyOf) - defined as a class but also appear on predicate position in other triples. The metric is computed as a ratio of misplaced classes and properties" ;	DQM Vocab		O	Y	Y	Duplicate - metric 30
129	Consistency	Misuse Owl datatype or object properties metric	"Detect properties that are defined as a owl:datatypeProperty but is used as objectProperty and properties defined as a owl:object property and used as datatype property. The metric is computed as a ratio of misused properties" ;	DQM Vocab		O	Y	Y	Duplicate - metric 31
130	Consistency	Ontology hijacking metric	"Detects the redefinition by third parties of external classes/properties such that reasoning over data using those external terms is affected" ;	DQM Vocab		O	N	Y
131	Consistency	Usage of Deprecated Classes or Deprecated Properties	"This metric checks if a dataset makes use of Deprecated Classes as resource types (defined as owl:DeprecatedClass) or Properties (defined as owl:DeprecatedProperty) in a resource property" ;	DQM Vocab		O	Y	Y	Duplicate - metric 32
132	Consistency	Incorrect Domain or Range Datatypes	"This metric tests if a property's domain and range are of the same type as declared in the corresponding schema" ;	DQM Vocab		O	Y	N
133	Consistency	Valid Usage of the owl:InverseFunctionalProperty	"This metric checks if the Inverse Functional Properties (IFP) is used correctly, i.e. if we have S P O and P is set to be an owl:InverseFunctionalProperty, then S is the one and only resource connected to O. If there is a triple S1 P O, then the IFP is not used correctly and thus since S1 will be 'reasoned' to be the same as S." ;	DQM Vocab		O	Y	N
134	Completeness	RDF Data Cube Population Completeness	"This metric checks if a dataset has observations that cover a gold standard codelist." ;	DQM Vocab		O	N	N
135	Conciseness	Extensional conciseness metric	"Provides a measure of the redundancy of the dataset at the data level, computed as the ratio of the Number of Unique Subjects to the Total Number of Subjects" ;	DQM Vocab		O	Y	N	Duplicate - metric 38
136	Syntactic Validity	Compatible Datatype		DQM Vocab		O	N	Y
137	Syntactic Validity	Correct Language Tag		DQM Vocab		O	N	Y
138	Syntactic Validity	Untyped Literals		DQM Vocab		O	N	Y
139	Understandability	Vocabulary Usage Indication	"This metric checks the number of valid vocabularies indicated by the voID metadata against the number of different vocabularies used." ;	DQM Vocab		O	Y	N	Duplicate - metric 86
140	Understandability	Human-readable labelling metric	Assesses the percentage of entities having an rdfs:label or rdfs:comment" ;	DQM Vocab		O	Y	N	Duplicate - metric 81
141	Understandability	Presence of URI Reguar Expression	"This metric checks if the dataset has a regular expression defined." ;	DQM Vocab		O	N	N
142	Timeliness	Freshness of Dataset Metric	"Checks if the data in the dataset is being updated with the original data" ;	DQM Vocab		O	N	N
143	Timeliness	Timeliness of the resource metric	"Assesses the difference between the last modified time of the original data source and the last modified time of the semantic web source, thereby indicating if the resource is outdated" ;	DQM Vocab		O	N	N
144	Timeliness	Currency of a Dataset	"Assesses the freshness (currency) of the data, i.e. how fresh is the data when delivered to the user (or how old is the data). " ;	DQM Vocab		O	N	N
145	Provenance	Extended Provenance Metric	"Measures the degree of the available provenance information (Agent and Datasource for Entities and Activities) that is available in a dataset for a consumer to get to know the origin of the datasource using the standard W3C Prov-O" ;	DQM Vocab		O	N	N
146	Provenance	Basic Provenance Metric	"Measures the degree of the basic provenance information, i.e. the creator or publisher, of a datasource" ;	DQM Vocab		O	Y	N
147	Representational Conciseness	Representational conciseness	"Measures the extent to which the representation of data is compact, clear and well formatted" ;	DQM Vocab		O	N	N
148	Representational Conciseness	Short URIs metric	"Detects the use of short URIs (and the avoidance of query parameters), which suggests that information is compactly represented and favors readability" ;	DQM Vocab		O	N	N
149	Representational Conciseness	No Use of Prolix RDF features metric	"Detects the use of prolix RDF features, i.e reification statements, containers and collections" ;	DQM Vocab		O	Y	N	Duplicate - metric 78
150	Versatility	Different Serialisation Metric	"Detects if a dataset has more than one serialisation format" ;	DQM Vocab		O	Y	Y	Duplicate - metric 93
151	Versatility	Multiple Language Usage Metric	"Detects if a dataset has more than one language" ;	DQM Vocab		O	Y	N	Duplicate - metric 94
152	Interpretability	Undefined classes and properties metric	"Detects undefined classes and properties" ;	DQM Vocab		O	Y	Y	Duplicate - metric 29
153	Interpretability	No blank node metric	"Provides a measure for the usage of blank nodes in a dataset" ;	DQM Vocab		O	Y	N	Duplicate - metric 153
154	Interoperability	Reuse existing terms metric	"Provides a qualitative measure for detecting the overlap of terms used in a dataset with existing terms." ;	DQM Vocab		O	Y	N	Duplicate - metric 154
155	Interoperability	Reuse existing vocabularies metric	"Provides a qualitative measure for detecting the overlap of vocabularies used in a dataset." ;	DQM Vocab		O	Y	N	Duplicate - metric 155
