# Supplementary material for: Automated approach for quality assessment of RDF resources
Source: BMC Med Inform Decis Mak. 2023 May 10;23(Suppl 1):90. doi: 10.1186/s12911-023-02182-8 (PMC10170671; doi:10.1186/s12911-023-02182-8)
Supplement: Supplementary file 2 — Additional file 2. List of automatable Metrics. Additional file 2 lists 34 curated automatable metricswith their attributes including quality dimension, metric name, definition, and whether it is foundational. [file 12911_2023_2182_MOESM2_ESM.xlsx]

## Sheet: List of Automatic Metrics
Dimension	Metric	Intepretation	Foundational
Availability	Non-resolvable URIs*	1) Check if an RDF resource is resolvable (Boolean), or 2) check if URIs in that RDF resource are resolvable, and measure the proportion of non-resolvable URIs to all unique URIs.	Y
Availability	Non-parsable URIs*	1) Check if an RDF resource is parsable (Boolean), or 2) check if URIs in that RDF resource which already indicate RDF content-type are parsable, and measure the proportion of non-parsable URIs to all unique URIs in that RDF resource.	Y		*Denoted metric is a curated metric incorporating multiple metrics, as described in Additional File 1
Consistency	Undefined URIs*	Measure the proportion of undefined URIs to all unique URIs in an RDF resource.	Y
Consistency	misplaced classes or properties	1)Measure the proportion of classes which are incorrectly used as a predicate to all unique classes; or 2) measure the proportion of prop- erties which are incorrectly used as a class to all unique properties.	Y
Consistency	misuse of owl:datatypeProperty or owl:objectProperty	Measure the proportion of misused ‘owl:DatatypeProperty‘ (or ‘owl:ObjectProperty‘ ) properties to all properties.	Y
Consistency	use of members of owl:DeprecatedClass or owl:-DeprecatedProperty	Measure the proportion of deprecated classes or properties to all unique classes or properties.	Y		Curated Automatic Metircs
Licensing	machine-readable indication of a license	detection of the indication of a license in the VoID description or in the dataset itself	N		count: 34
Licensing	human-readable indication of a license	detection of a license in the documentation of the dataset or its source	N
Performance	no usage of slash-URIs	checking for usage of slash-URIs where large amounts of data is provided	N
Performance	low latency	delay between submission of a request by the user and reception of the response from the system	N
Performance	high throughput	no. of answered HTTP-requests per second	N		Foundational Metircs
Performance	scalability of a data source	detection of whether the time to answer an amount of ten requests divided by ten is not longer than the time it takes to answer one request	N		count: 6
Conciseness	extensional conciseness	The number of unique objects in a dataset divided by the total number of object representations in the dataset	N
Conciseness	duplicate instance	One minus the proportion of the duplcate instances to all relevant instances	N
Believability	indication of metadata about a dataset (provenance information)	presence of the title, content and URI of the dataset	N
Verifiability	authenticity of the dataset	verifying authenticity of the dataset based on a provenance vocabulary such as the author and his contributors, the pub- lisher of the data and its sources if any	N
Completeness	schema completeness	no. of classes and properties represented / total no. of classes and properties	N
Amount-of-data	amount of triples	no. of triples present in a dataset	N
Amount-of-data	coverage	scope (no. of entities) and level of detail (no. of properties)	N
Representational- conciseness	no use of prolix RDF features	detect use of RDF primitives i.e. RDF reification, RDF containers and RDF collections	N
Representational- consistency	re-use existing terms	detect whether existing terms from other vocabularies have been reused	N
Representational- consistency	re-use existing vocabularies	usage of established vocabularies	N
Understandability	human-readable labelling of classes, properties and entities	percentage of entities having an rdfs:label or rdfs:comment	N
Understandability	dereferenced representations: providing human-readable metadata	detecting the use of rdfs:label to attach labels or names to resources	N
Understandability	indication of the vocabularies used in the dataset	checking whether a list of vocabularies used in the dataset is provided	N
Interpretability	misinterpretation of missing values	detecting use of blank nodes	N
Interpretability	atypical use of collections, containers and reification	detect non-standard usage of collections, containers and reification(since these features are discouraged from use by Linked Data guidelines)	N
Versatility	provision of the data in various languages	checking whether data is available in different languages	N
Compliance	Compliance	The degree to which data has attributes that adhere to standards, conventions or regulations in force and similar rules relating to data quality in a specific context of use.	N
Efficiency	Efficiency	The degree to which data has attributes that can be processed and provide the expected levels of performance by using the appropriate amounts and types of resources in a specific context of use.	N
Portability	Portability	The degree to which data has attributes that enable it to be installed, replaced or moved from one system to another preserving the existing quality in a specific context of use.	N
Consistency	Incorrect Domain or Range Datatypes	This metric tests if a property's domain and range are of the same type as declared in the corresponding schema	N
Consistency	Valid Usage of the owl:InverseFunctionalProperty	This metric checks if the Inverse Functional Properties (IFP) is used correctly, i.e. if we have S P O and P is set to be an owl:InverseFunctionalProperty, then S is the one and only resource connected to O. If there is a triple S1 P O, then the IFP is not used correctly and thus since S1 will be 'reasoned' to be the same as S.	N
Provenance	Basic Provenance Metric	Measures the degree of the basic provenance information, i.e. the creator or publisher, of a datasource	N

## Sheet: # Uncurated Automatic Metrics
Source	Dimension	# Metrics
Zaveri's (32 metrics in 15 dimensions)	Availability	3
	Licensing	2
	Performance	4
	Consistency	4
	Conciseness	2
	Believability	1
	Verifiability	1
	Completeness	1
	Amount-of-data	2
	Representational Conciseness	2
	Representational- consistency	1
	Understandability	3
	Interpretability	2
	Versatility	3
	Consistency	1
ISO25012:2008 (5 metrics in 5 dimensions)	Accessibility	1
	Compliance	1
	Efficiency	1
	Availability	1
	Portability	1
Luzzu DQM Vocab (24 metrics in 10 dimensions)	Availability	2
	Licensing	2
	Performance	4
	Consistency	5
	Conciseness	1
	Understandability	2
	Provenance	1
	Representational Conciseness	1
	Versatility	2
	Interpretability	4
Total		61
